# Supplementary material for: Surge dynamics and lake outbursts of Kyagar Glacier, Karakoram
Source: Copernicus journal article supplement (doi:10.5194/tc-2016-236), 2016-11-10
Supplement: Supplementary file 1 [file Supplementary tables.pdf › Supplementary tables.pdf]

## Supplementary material.

**Table S1.** List of satellite acquisitions used.

| TanDEM-X<br>Orbit 75D | TanDEM-X<br>Orbit 98A | Landsat<br>Path148, Row35 | Sentinel-1A<br>00:58 decending | Sentinel-1A<br>00:49 decending |
|-----------------------|-----------------------|---------------------------|--------------------------------|--------------------------------|
| 20.11.2012            | 19.09.2011            | 14.07.2013                | 08.10.2014                     | 03.10.2014                     |
| 22.08.2013            | 29.01.2012            | 30.07.2013                | 20.10.2014                     | 27.10.2014                     |
| 16.10.2013            | 28.02.2013            | 03.11.2013                | 01.11.2014                     | 20.11.2014                     |
| 03.02.2014            | 31.03.2014            | 12.04.2014                | 13.11.2014                     | 14.12.2014                     |
| 11.05.2015            | 01.05.2015            | 28.04.2014                | 25.11.2014                     | 07.01.2015                     |
| 22.05.2015            | 23.05.2015            | 30.05.2014                | 07.12.2014                     | 31.01.2015                     |
| 02.06.2015            | 03.06.2015            | 15.06.2014                | 19.12.2014                     | 31.01.2015                     |
| 13.06.2015            | 17.07.2015            | 01.07.2014                | 31.12.2014                     | 24.02.2015                     |
| 24.06.2015            | 28.07.2015            | 18.08.2014                | 12.01.2015                     | 20.03.2015                     |
| 16.07.2015            | 08.08.2015            | 19.09.2014                | 05.02.2015                     | 13.04.2015                     |
| 27.07.2015            | 19.08.2015            | 05.10.2014                | 05.02.2015                     | 07.05.2015                     |
| 07.08.2015            | 03.07.2016            | 21.10.2014                | 17.02.2015                     | 31.05.2015                     |
| 18.08.2015            | 25.07.2016            | 24.12.2014                | 01.03.2015                     | 24.06.2015                     |
| 29.08.2015            | 05.08.2016            | 09.01.2015                | 13.03.2015                     | 18.07.2015                     |
| 09.09.2015            |                       | 10.02.2015                | 25.03.2015                     | 11.08.2015                     |
| 20.09.2015            |                       | 15.04.2015                | 06.04.2015                     | 04.09.2015                     |
| 01.10.2015            |                       | 01.05.2015                | 18.04.2015                     | 28.09.2015                     |
| 12.10.2015            |                       | 02.06.2015                | 30.04.2015                     |                                |
| 23.10.2015            |                       | 18.06.2015                | 12.05.2015                     |                                |
| 03.11.2015            |                       | 04.07.2015                | 24.05.2015                     |                                |
| 14.11.2015            |                       | 05.08.2015                | 05.06.2015                     |                                |
| 25.11.2015            |                       | 21.08.2015                | 17.06.2015                     |                                |
| 06.12.2015            |                       | 08.10.2015                | 11.07.2015                     |                                |
| 17.12.2015            |                       | 28.01.2016                | 23.07.2015                     |                                |
| 28.12.2015            |                       | 29.02.2016                | 16.08.2015                     |                                |
| 02.07.2016            |                       | 16.03.2016                | 28.08.2015                     |                                |
| 13.07.2016            |                       | 01.04.2016                | 09.09.2015                     |                                |
| 24.07.2016            |                       | 17.04.2016                | 15.10.2015                     |                                |
| 04.08.2016            |                       | 03.05.2016                |                                |                                |
| 15.08.2016            |                       | 04.06.2016                |                                |                                |

**Table S2.** Lake volumes, as estimated from satellite images.  
Outburst volumes estimated by extrapolation of filling rate.

| Date                                                               | Lake volume<br>(million m <sup>3</sup> ) |
|--------------------------------------------------------------------|------------------------------------------|
| 01.12.2014                                                         | 0                                        |
| 10.02.2015                                                         | 0.1                                      |
| 15.04.2015                                                         | 0.2                                      |
| 11.06.2015                                                         | 1                                        |
| 17.06.2015                                                         | 2                                        |
| 23.06.2015                                                         | 3                                        |
| 05.07.2015                                                         | 10                                       |
| 11.07.2015                                                         | 20                                       |
| 18.07.2015                                                         | 31                                       |
| 23.07.2015                                                         | 45                                       |
| 27.07.2015                                                         | 53                                       |
| Lake outburst 27.07.2016<br>(estimated 40 million m <sup>3</sup> ) |                                          |
| 28.07.2015                                                         | 0                                        |
| 20.09.2015                                                         | 1                                        |
| 12.10.2015                                                         | 1.5                                      |
| 06.12.2015                                                         | 1.5                                      |
| 17.12.2015                                                         | 1.5                                      |
| 29.02.2016                                                         | 5                                        |
| 29.03.2016                                                         | 5                                        |
| 06.03.2016                                                         | 5                                        |
| 17.04.2016                                                         | 5                                        |
| 03.05.2016                                                         | 5                                        |
| 04.06.2016                                                         | 6                                        |
| 07.06.2016                                                         | 7                                        |
| 20.06.2016                                                         | 13                                       |
| 29.06.2016                                                         | 20                                       |
| 05.07.2016                                                         | 30                                       |
| 13.07.2016                                                         | 36                                       |
| Lake outburst 17.07.2016<br>(estimated 40 million m <sup>3</sup> ) |                                          |
| 24.07.2016                                                         | 3                                        |
| 25.07.2016                                                         | 5                                        |
| 04.08.2016                                                         | 28                                       |
| 10.08.2016                                                         | 37                                       |
| Lake outburst 17.07.2016<br>(estimated 40 million m <sup>3</sup> ) |                                          |
